1 **Effects of episodic future thinking on temporal discounting: a re-analysis of**  
2 **six data sets using hierarchical Bayesian parameter estimation and**  
3 **compilation of effect sizes.**

4

5 Jan Peters<sup>1</sup>, Stefanie Brassen<sup>2</sup>, Uli Bromberg<sup>2</sup>, Christian Büchel<sup>2</sup>, Laura Sasse<sup>2</sup>, Antonius  
6 Wiehler<sup>3</sup>

7

8 <sup>1</sup>Department of Psychology, Biological Psychology, University of Cologne, Germany

9 <sup>2</sup>Department of Systems Neuroscience, University Medical Center Hamburg-Eppendorf,  
10 Hamburg, Germany

11 <sup>3</sup>Institut du Cerveau et de la Moelle épinière (ICM), INSERM U 1127, CNRS UMR 7225,  
12 Sorbonne Universités Paris, France.

13

14

15

16

17

18 **Correspondence:** [jan.peters@uni-koeln.de](mailto:jan.peters@uni-koeln.de)

19

20

21

22 **Acknowledgements**

23 This work was funded by the DFG (grants PE1627/3-1 and PE1627/5-1 to J.P. and BR2877/2-  
24 2 to S.B.).

25

26 **Abstract**

27 Temporal discounting refers to the tendency of humans and many animals to devalue rewards  
28 as a function of time. Steep discounting of value over time is associated with a range of  
29 psychiatric disorders, including substance use disorders and behavioral addictions, and  
30 therefore of potentially high clinical relevance. One cognitive factor that has repeatedly been  
31 shown to reduce temporal discounting in humans is episodic future thinking, the process of  
32 vividly imagining future outcomes, which has been linked to hippocampal mechanisms in a  
33 number of studies. However, the analytical approaches used to quantify the behavioral effects  
34 have varied between studies, which complicates a direct comparison of the obtained effect sizes.  
35 Here we re-analyzed temporal discounting data from previously published functional magnetic  
36 resonance imaging (fMRI) and behavioral studies (six data sets from five papers, n=204  
37 participants in total) using an identical model structure and hierarchical Bayesian parameter  
38 estimation procedure. Analyses confirmed that engagement in episodic future thinking leads to  
39 robust and consistent reductions in temporal discounting with on average medium effect  
40 sizes. In contrast, effects on choice consistency (decision noise) were small and with  
41 inconsistent directionality. We provide standardized and unstandardized effect size estimates  
42 for each data set and discuss clinical implications as well as issues of hierarchical Bayesian  
43 parameter estimation.  
44

## 45 **Introduction**

46 Temporal discounting refers to the tendency of humans and many animals to de-value rewards  
47 as a function of the time to their delivery <sup>1,2</sup>. While earlier studies have focused on steep reward  
48 discounting in substance-use-disorders<sup>3</sup> and behavioral addictions such as gambling disorder <sup>4</sup>,  
49 both steep and shallow discounting have been associated with various psychiatric and  
50 neurological disorders<sup>5</sup>.

51 In the light of these associations between temporal discounting and mental disorders,  
52 cognitive factors and interventions with the potential to attenuate discounting are of  
53 considerable clinical interest <sup>6,7</sup>. One such mechanism that has gained substantial empirical  
54 support in recent years is episodic future thinking, that is, the ability to use prospection to form  
55 vivid mental representations of future outcomes <sup>8</sup>. Following earlier theoretical work <sup>9</sup> initial  
56 empirical work confirmed that engagement in episodic future thinking can reduce temporal  
57 discounting behavior <sup>10</sup>. This effect has since then been replicated numerous times using a range  
58 of different tasks and experimental manipulations, as outlined in a recent meta-analysis <sup>11</sup>.

59 Episodic future thinking has been shown to affect temporal discounting in a variety of  
60 experimental designs <sup>7,11</sup>. Previous work from our group has focused on trial-wise <sup>10,12,13</sup> and  
61 block-wise <sup>14,15</sup> presentation of episodic cues during temporal discounting. In this experimental  
62 design, control trials involve choices between smaller-but-sooner and larger-but-later rewards.  
63 In some trials (episodic trials), the larger-but-later reward is additionally enriched by verbal  
64 episodic cues (tags) that serve as reminders of subject-specific events scheduled for the  
65 respective future time point associated with the delayed reward. In our trial-wise design,  
66 episodic and control trials are randomly intermixed<sup>10,12,13</sup>, whereas in the block.-wise design,  
67 blocks of episodic and control trials are completed separately in the same experimental  
68 session<sup>14,15</sup>. We investigated this effect in a number of previous studies summarized in Table 1  
69 with n=204 participants in total. However, because modeling methods have continued to  
70 evolve, in our previous studies we have applied a range of different analytical approaches and  
71 model estimation schemes. In Peters & Buchel (2010), we fit hyperbolic discounting functions  
72 to estimated indifference points, separately for each participant and experimental condition, an  
73 approach that can be associated with some methodological problems<sup>16</sup>, e.g. this approach  
74 confounds goodness-of-fit ( $R^2$ ) with the discount rate <sup>16</sup>. In Bromberg et al. (2017) and Sasse et  
75 al. (2015, 2017), we applied Maximum Likelihood estimation using softmax action selection<sup>17</sup>,  
76 and fitted models separately to the data from each subject and condition. In Wiehler et al.  
77 (2017), we used hierarchical Bayesian parameter estimation, and assumed separate group-level  
78 distributions per group (gamblers vs. controls) and condition (episodic vs. control). It is clear

79 that effect size estimates obtained from these different analytical approaches are not readily  
80 comparable, which poses a problem for e.g. meta-analyses of factors influencing discounting  
81 behavior <sup>11</sup> or future power analyses that depend on the availability of comparable effect size  
82 estimates for different subject populations or age groups.

83 We therefore re-analyzed all our previously published data sets using the identical  
84 Bayesian estimation framework and using exactly the same hierarchical Bayesian model,  
85 yielding effect size estimates that are unconfounded by differences in the applied analytical  
86 approaches.

87

## 88 **Methods**

89 We re-analyzed six data sets from five previously published studies on the effects of trial-wise  
90 and block-wise episodic cues on temporal discounting behavior (see Table 1).

91

92 **Table 1.** Overview of the included data sets and temporal discounting task details. <sup>§</sup>Data from  
93 Experiment 1 (n=30) and the Experiment 2 (n=16) were pooled. <sup>#</sup>Data from n=23 (n=24) gamblers  
94 (controls) that underwent fMRI was pooled with data from n=7 (n=8) gamblers (controls) that only  
95 performed a behavioral version of the task. <sup>§</sup>In addition to the participants reported in Sasse et al. (2015,  
96 2017), data from participants that were excluded from the fMRI analyses due to excessive motion were  
97 included in the present re-analysis.

|                                               | <b>N</b>            | <b>Mean age</b> | <b>Smaller-sooner</b> | <b>Episodic tag</b>      |
|-----------------------------------------------|---------------------|-----------------|-----------------------|--------------------------|
|                                               | <b>(fMRI/Behav)</b> |                 | <b>value (€)</b>      | <b>presentation mode</b> |
| <b>Peters &amp; Büchel (2010)<sup>§</sup></b> |                     |                 |                       |                          |
| <i>Healthy young adults</i>                   | 30/16               | 25.4            | 20                    | Trial-wise               |
| <b>Wiehler et al. (2017)<sup>#</sup></b>      |                     |                 |                       |                          |
| <i>Pathological gamblers</i>                  | 23/7                | 29.7            | 20                    | Trial-wise               |
| <i>Healthy matched controls</i>               | 24/8                | 28.5            | 20                    | Trial-wise               |
| <b>Bromberg et al. (2017)</b>                 |                     |                 |                       |                          |
| <i>Healthy adolescents</i>                    | -/44                | 15.0            | 10                    | Trial-wise               |
| <b>Sasse et al. (2015, 2017)<sup>§</sup></b>  |                     |                 |                       |                          |
| <i>Healthy young adults</i>                   | 26/-                | 24.9            | 20                    | Block-wise               |
| <i>Healthy older adults</i>                   | 26/-                | 66.6            | 20                    | Block-wise               |

98

99 In the control condition, participants made repeated choices between a smaller-but-sooner (SS)  
100 reward available immediately, and larger-but-later (LL) rewards.

101 In the trial-wise presentation studies<sup>10,12,13</sup>, in episodic trials subjects were additionally  
102 presented with subject-specific episodic event cues (episodic tags) referring to events planned  
103 at the respective time of delivery of the LL reward. These events were obtained for each  
104 individual participant in pre-experimental interviews and always referred to real and subject-  
105 specific events. Experiment 2 from Peters & Buchel (2010) additionally included an  
106 “unspecific” condition with hypothetical event cues. Due to lack of comparability with the other  
107 data sets, these data were not included here. In the trial-wise studies, participants completed  
108 112 trials for each condition, and episodic and control trials were randomly intermixed.

109 In the block-wise presentation studies<sup>14,15</sup>, control blocks (two blocks of thirty six trials  
110 each) consisted of trials without episodic information. Episodic familiar blocks (two blocks of  
111 thirty-six trials each) involved the additional reference to a personally familiar event  
112 (individualized, each block with one distinct cue, e.g. “meeting with mum”). Data from the  
113 episodic unfamiliar condition<sup>14,15</sup> included a cue referring to an unfamiliar episode (e.g.

114 “meeting chancellor Merkel”). These data were not included here for lack of comparability with  
115 the trial-wise experimental designs outline above, which always included personally familiar  
116 episodes.

117 For further details regarding trial construction and timing we refer the reader to the  
118 original publications (see Table 1).

119

## 120 **Computational modeling**

### 121 *Temporal discounting model*

122 We applied a simple single-parameter hyperbolic discounting model to account for how value  
123 changes as a function of delay:

$$124 \quad SV(LL_t) = \frac{A_t}{1 + \exp(k + s_{\log(k)} * I_t) * D_t} \quad (Eq. 1)$$

125 Here,  $A_t$  is the numerical reward amount of the LL option on trial  $t$ ,  $D_t$  is the LL delay in days  
126 on trial  $t$  and  $I_t$  is an indicator variable that takes on a value of 1 for trials from the episodic  
127 condition (including episodic tags) and 0 for trials from the control condition (without episodic  
128 tags). The value function has two free parameters:  $k$  is the hyperbolic discounting rate from the  
129 control condition (modeled in log-space) and  $s_k$  is a coefficient modeling the degree of change  
130 in discounting for episodic vs. control trials.

131 We then used softmax action selection to model choice probabilities as a sigmoid  
132 function of value differences<sup>18</sup>:

133

$$134 \quad P(LL)_t = \frac{e^{(\beta + s_{\beta} * I_t) * SV(LL_t)}}{e^{(\beta + s_{\beta} * I_t) * SV(SS_t)} + e^{(\beta + s_{\beta} * I_t) * SV(LL_t)}} \quad (Eq. 2)$$

135

136 Here,  $SV$  is the subjective value of the delayed reward according to Eq. 1 and  $\beta$  is an inverse  
137 temperature parameter, modeling choice stochasticity (for  $\beta = 0$ , choices are random and as  $\beta$   
138 increases, choices become more dependent on the option values). The value of the immediate  
139 smaller-sooner reward  $SV(SS_t)$  was fixed throughout the experiments, but differed between  
140 studies (see Table 1).  $I_t$  is again a dummy predictor coding for the episodic condition, and  $s_{\beta}$   
141 models the effect of the episodic condition on  $\beta$ .

142

### 143 *Data sets and participants*

144 Model fitting was performed separately for each of the six datasets (see Table 1). For the Peters  
145 & Buchel (2010) and Wiehler et al. (2017) studies, we pooled data across participants that

146 underwent fMRI, and participants that performed the same task without imaging (i.e.  
147 Experiment 1 and the temporally specific condition of Experiment 2 for Peters & Buchel  
148 (2010); behavioral pilot subjects and fMRI participants for Wiehler et al. (2017)). Note that we  
149 excluded one participant from the gambling group of the Wiehler et al. (2017) study, who made  
150 only a very small number of larger-later choices. Inclusion of this participant resulted in the  
151 hierarchical model that included within-subject changes in the softmax  $\beta$  parameter (Eq. 2) to  
152 fail to converge. For the Sasse et al. (2015, 2017) data, we additionally included the data from  
153 participants that were excluded from the original analyses due to excessive motion during fMRI  
154 ( $n=3$  for Sasse et al., 2015;  $n=4$  for Sasse et al., 2017), which is the reason for the discrepancy  
155 in sample sizes between Table 1 and the original papers.

156

157 **Table 2.** Overview of priors for group means.

| Parameter     | Group-level prior ( $\mu$ ) |
|---------------|-----------------------------|
| $\log(k)$     | Uniform (-20, 3)            |
| $s_{\log(k)}$ | Gaussian (0, 2)             |
| $\beta$       | Uniform (0,10)              |
| $s_{\beta}$   | Gaussian (0, 2)             |

158

159 *Hierarchical Bayesian models*

160 We analyzed each data set of Table 1 separately. Models were fit to all trials from all  
161 participants in a hierarchical Bayesian framework using Markov Chain Monte Carlo as  
162 implemented in JAGS 4.2.0<sup>19</sup> using the *matjags* interface for Matlab © (The Mathworks). We  
163 applied the same hierarchical model for each data set. Parameter values for each participant  
164 were drawn from group-level Gaussian distributions, the mean and precision of which were  
165 estimated from the data. For group-level precision parameters, we used Gamma distributed  
166 priors. For group-level means of  $\log(k)$  and  $\beta$ , we used uniform priors defined over numerically  
167 plausible parameter ranges (see Table 2). For group-level means of effects of the episodic  
168 condition ( $s_{\log(k)}, s_{\beta}$ ) we used Gaussian priors centered at zero (see Table 2). JAGS model code  
169 is available on the Open Science Framework (<https://osf.io/bkgfd/>).

170 We ran two chains with a burn-in period of 150k samples and thinning factor of 2. 5k  
171 additional samples were then retained for further analysis. Chain convergence was confirmed  
172 using the Gelman-Rubinstein convergence diagnostic  $\hat{R}$ , where we considered values of  $1 \leq$   
173  $\hat{R} \leq 1.01$  as acceptable for all group-level and subject-level parameters. Evidence for an effect  
174 of the episodic future thinking manipulation was examined by computing Bayes Factors testing  
175 for directional effects<sup>20,21</sup> on the posterior distributions of the group-level means of  $s_{\log(k)}$  and  
176  $s_{\beta}$ . We also report standardized effect sizes for all condition effects (Cohen's  $d$ ) which were

177 calculated based on the means of the posterior means and precisions of  $s_{\log(k)}$  and  $s_{\beta}$  (see  
 178 Equations 1 and 2).

179

## 180 Results

181 Mean changes for  $\log(k)$  and  $\beta$  ( $s_{\log(k)}$ ,  $s_{\beta}$ ) in the episodic condition are summarized in Table  
 182 3. Figure 1 shows posterior distributions for  $\log(k)$  (upper panels) as well as changes in  $\log(k)$   
 183 due to episodic cueing (lower panels) for all data sets.

184

185 **Table 3.** Overview of mean condition effects (change in model parameters from control to episodic  
 186 condition) and Bayes Factors for directional effects (dBF: parameter reduction vs. increase).  
 187 Standardized effect sizes (Cohen's  $d$ ) were calculated based on the estimated group-level posterior mean  
 188 and precision parameters for  $s_{\log(k)}$  (see Eq. 1) and  $s_{\beta}$  (see Eq. 2) from the hierarchical model. <sup>§</sup>Data  
 189 from Experiments 1 and the temporally specific condition of experiment 2 were pooled. <sup>#</sup>Only data from  
 190 the personally familiar episodic and control conditions were included (see Sasse et al., 2015, 2017).

|                                               | Log (k)      |       |        | Softmax $\beta$ |       |      |
|-----------------------------------------------|--------------|-------|--------|-----------------|-------|------|
|                                               | M (SD)       | $d$   | dBF    | M (SD)          | $d$   | dBF  |
| <b>Peters &amp; Büchel (2010)<sup>§</sup></b> |              |       |        |                 |       |      |
| <i>Healthy young adults (n=46)</i>            | -.108 (.207) | -.519 | 97.15  | -.004 (.059)    | -.071 | 1.24 |
| <b>Wiehler et al. (2017)</b>                  |              |       |        |                 |       |      |
| <i>Pathological gamblers (n=30)</i>           | -.120 (.217) | -.552 | 34.69  | -.034 (.149)    | -.223 | 4.43 |
| <i>Healthy controls (n=32)</i>                | -.069 (.240) | -.287 | 6.52   | .020 (.071)     | .284  | 0.26 |
| <b>Bromberg et al. (2017)</b>                 |              |       |        |                 |       |      |
| <i>Adolescents (n=44)</i>                     | -.221 (.277) | -.799 | 2441.2 | .003 (.061)     | .041  | 1.02 |
| <b>Sasse et al. (2015, 2017)<sup>#</sup></b>  |              |       |        |                 |       |      |
| <i>Healthy young adults (n=26)</i>            | -.280 (.578) | -.485 | 38.89  | .075 (.264)     | .284  | 3.62 |
| <i>Healthy older adults (n=26)</i>            | .006 (.315)  | .018  | .91    | -.054 (.146)    | -.367 | .115 |

191



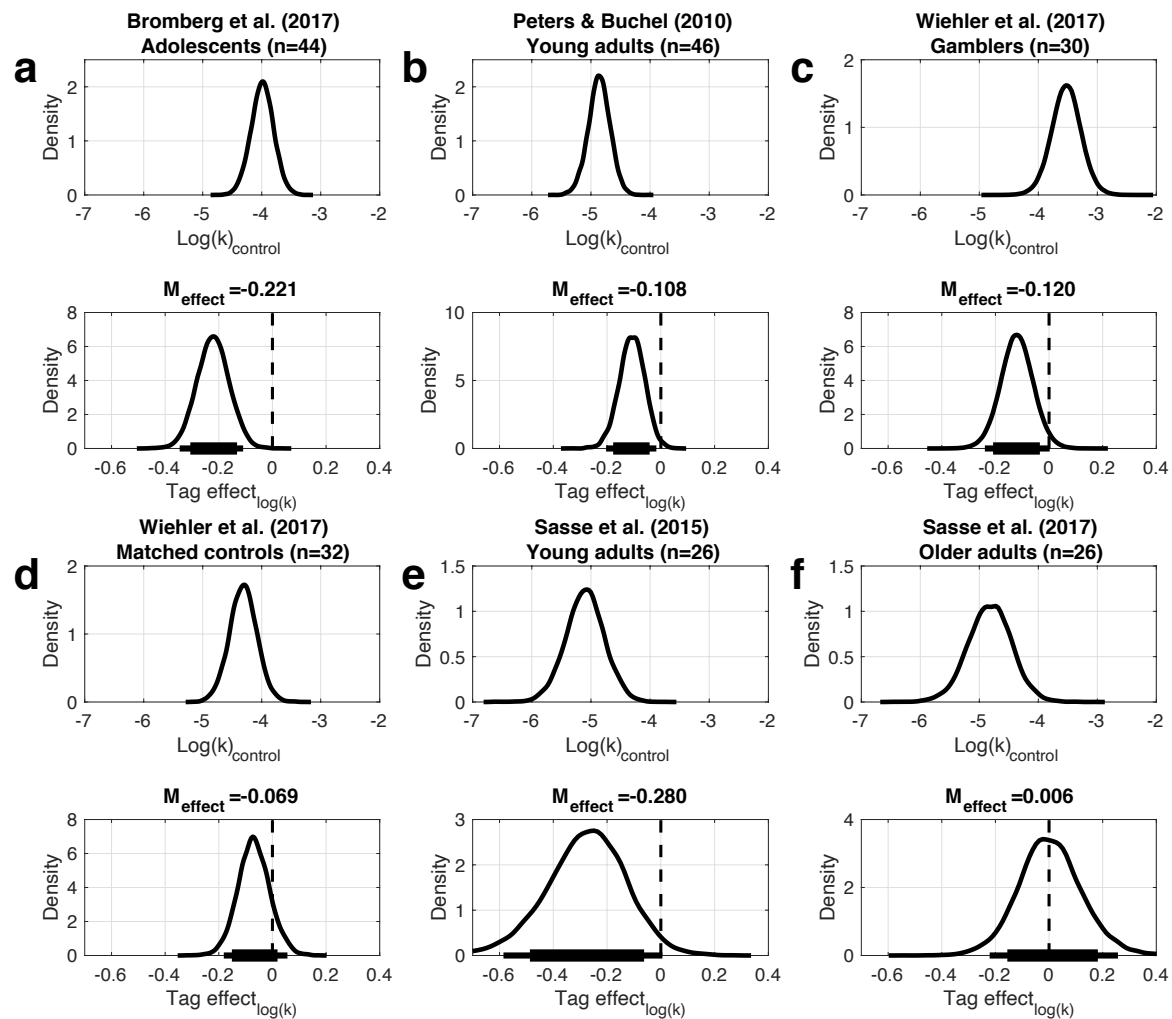

192

193 **Figure 1.** Posterior distributions of the hyperbolic discount rate  $\text{log}(k)$  in the control condition (upper  
 194 panels) and the change in  $\text{log}(k)$  in the episodic vs. the control condition ( $S_{\text{log}(k)}$ , lower panels). a)  
 195 Healthy adolescents from Bromberg et al. (2017). b) Healthy young adults from Peters & Buchel (2010).  
 196 c) Gambling disorder participants from Wiehler et al. (2017). d) Healthy matched controls from Wiehler  
 197 et al. (2017). e) Healthy young adults from Sasse et al. (2015). f) Healthy older adults from Sasse et al.  
 198 (2017). The solid (thin) horizontal lines denote 85% (95%) highest density intervals.

199

200 Across studies, the change in  $\text{log}(k)$  was consistently negative, with the older adults from Sasse  
 201 et al. 2017 being the only exception with a posterior distribution that was centered at zero.  
 202 However, effect sizes (mean changes) in  $\text{log}$ -space ranged from  $-0.07$  to  $-0.280$  ( $d$  ranged from  
 203  $.018$  to  $-0.799$ , Table 3 and Figure 1). There was also heterogeneity in this effect across  
 204 participants. We illustrate this variability in Figure 2, where we plot posterior distributions of  
 205  $S_{\text{log}(k)}$  for each individual participant, separately for the six data sets.

206

In contrast, the observed mean changes in  $\beta$  (see Figure 3) were generally small and  
 207 with inconsistent directionality across groups (see Table 3).

208

209

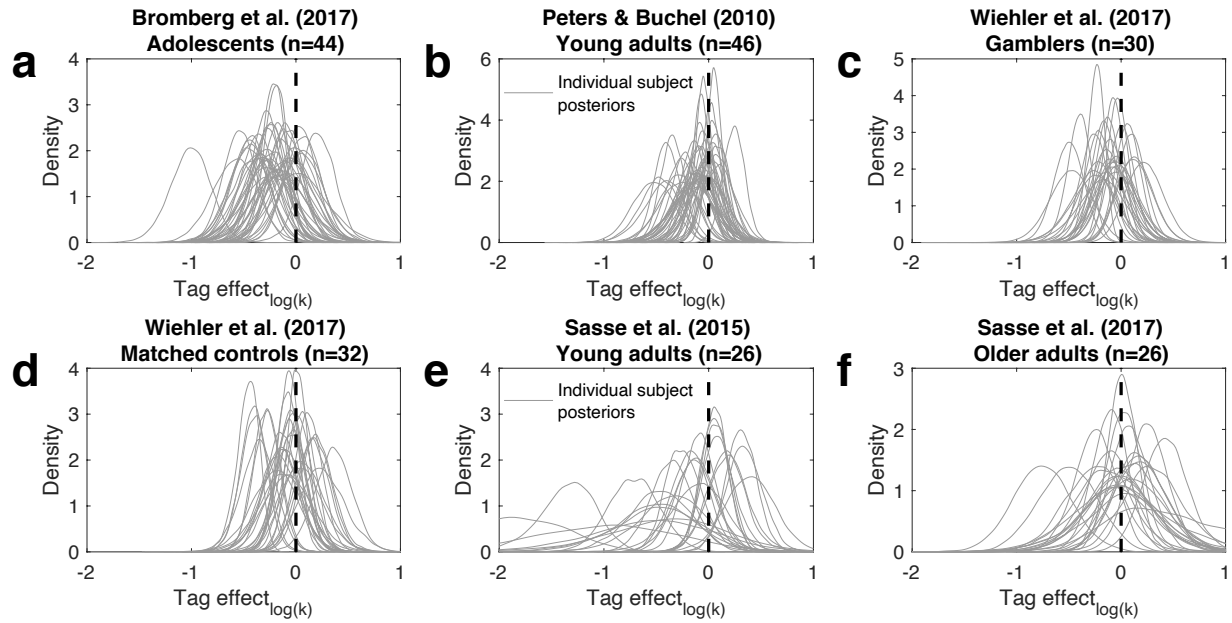

210  
211  
212  
213  
214  
215  
216

**Figure 2.** Individual subject posterior distributions of the change in  $\log(k)$  in the episodic vs. the control condition ( $s_{\log(k)}$ ). a) Healthy adolescents from Bromberg et al. (2017). b) Healthy young adults from Peters & Buchel (2010). c) Gambling disorder participants from Wiehler et al. (2017). d) Healthy matched controls from Wiehler et al. (2017). e) Healthy young adults from Sasse et al. (2015). f) Healthy older adults from Sasse et al. (2017).

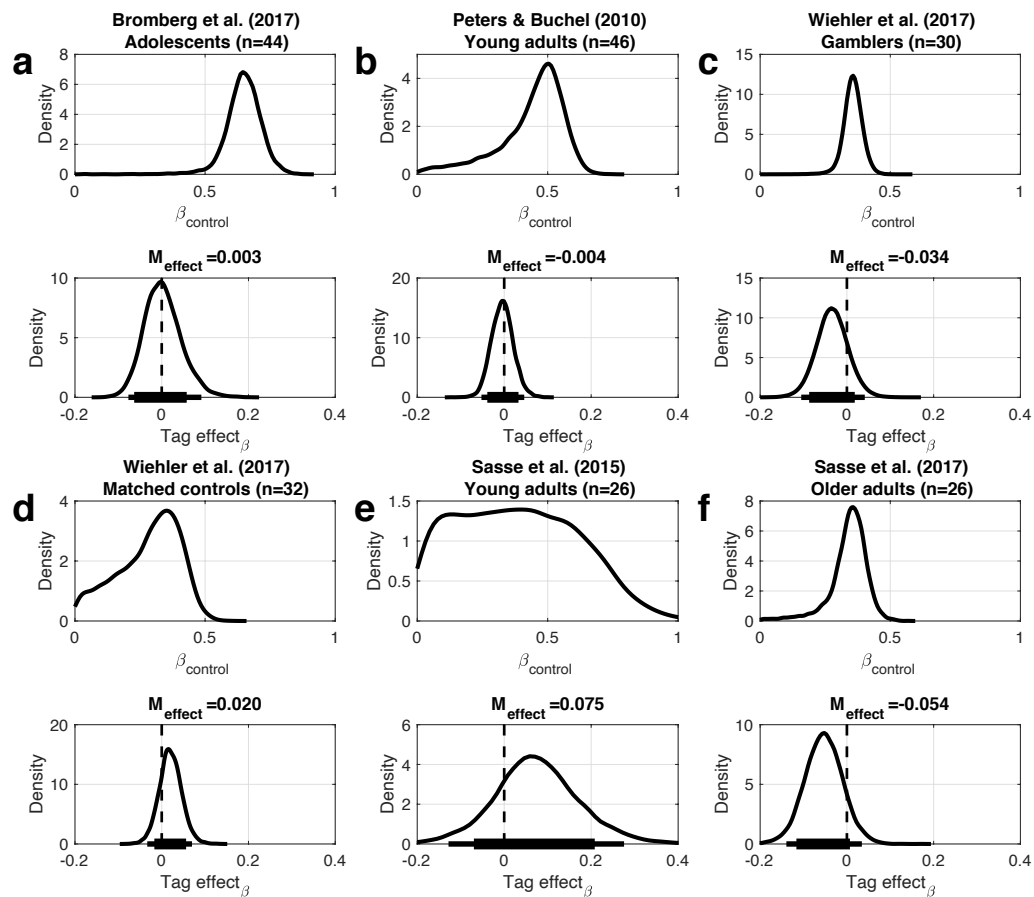

217

218 **Figure 3.** Posterior distributions of softmax inverse temperature parameter  $\beta$  in the control condition

219 (top row) and the change in  $\beta$  in the episodic vs. the control condition ( $S_{\beta}$ , bottom row). a) Healthy

220 adolescents from Bromberg et al. (2017). b) Healthy young adults from Peters & Buchel (2010). c)

221 Gambling disorder participants from Wiehler et al. (2017). d) Matched controls from Wiehler et al.

222 (2017). e) Young adults from Sasse et al. (2015). f) Older adults from Sasse et al. (2017). The solid

223 (thin) horizontal lines denote 85% (95%) highest density intervals.

224

225

## 226 Discussion

227 Here we re-analyzed previously published data on episodic future thinking effects on temporal  
228 discounting (six data sets from five papers,  $n=204$  subjects in total). Our results provide  
229 comparable effect size estimates across studies, and confirm robust and consistent effects of  
230 episodic future thinking on temporal discounting in designs involving trial-wise and block-wise  
231 presentations of episodic cues (tag effect) in most data sets.

232 Our analyses advance over previous analytical approaches in three ways. First, we  
233 accounted for the within-subject nature of the experimental design at the model estimation  
234 stage. That is, model parameters in the control condition were modeled as the baseline, and  
235 changes from that baseline due to episodic cueing were modeled as additive within-subject  
236 changes. There is generally a high level of both short-term and long-term stability in discount  
237 rates<sup>22–25</sup>. Modeling condition effects as within-subject changes from a baseline condition  
238 reduces the variability in the posterior distribution of the treatment effect (e.g.  $s_{\log(k)}$ ),  
239 compared to a model that estimates independent parameters or posterior distributions per  
240 condition, as we have done previously<sup>10,12–15,10,12,13</sup>. Second, our use of hierarchical Bayesian  
241 parameter estimation entails additional advantages. In hierarchical Bayesian estimation,  
242 individual participant's parameters are assumed to be drawn from group-level Gaussian  
243 distributions, such that each participant's parameters are informed and constrained by the  
244 distribution of parameters in the entire sample. This “partial pooling” or “shrinkage” can  
245 increase the robustness of the resulting estimates<sup>26</sup>. Finally, we have applied the exact same  
246 hierarchical model and estimation procedure across all six datasets. Consequently, the effect  
247 size estimates reported here are unconfounded by differences in model structure, priors, and/or  
248 estimation procedures, and therefore constitute the best available estimates of effect sizes for  
249 these experimental designs.

250 In contrast to some of our earlier work<sup>10,13</sup>, we additionally examined the degree to  
251 which episodic tags affected overall decision noise (softmax  $\beta$ ). Note that potential changes in  
252  $\beta$  could reflect differences in the best-fitting discounting model<sup>17</sup> and/or unmodeled systematic  
253 influences on choice patterns, as well as the level unsystematic noise in the behavioral data. In  
254 contrast to episodic effects on  $\log(k)$ , which showed consistent directionality across studies and  
255 generally medium effect sizes, episodic cueing effects on  $\beta$  were generally smaller and  
256 showed inconsistent directionality across studies. Under some conditions, changes in decision  
257 noise can seemingly give rise to changes in discounting behavior<sup>27–29</sup>, an effect that depends on  
258 the individual level of discounting in relation to the space of choice options examined in a given  
259 experimental task. The fact that episodic thinking effects on  $\beta$  were generally small and of

260 inconsistent directionality argues against an unspecific effect of episodic cues on overall choice  
261 patterns.

262 Our analysis revealed robust effects of episodic future thinking on temporal discounting  
263 in pathological gamblers. In our previous report <sup>12</sup>, we did not account for the within-subject  
264 nature of the design at the model estimation stage, which likely increased the variance in the  
265 observed group-level parameters, precluding us from accurately estimating the magnitude and  
266 variance of the episodic tag effect. Here we show that the effect size of the tag effect on log(k)  
267 in pathological gamblers is in fact of comparable magnitude to that observed in our previous  
268 study in healthy young participants <sup>10</sup>, while the effect is somewhat less pronounced in the  
269 healthy matched control group of the Wiehler et al. (2017) study. This means that, if anything,  
270 we have previously underestimated the magnitude of this effect in pathological gamblers. In  
271 the light of the fact that increases in temporal discounting are implicated in a range of  
272 psychiatric disorders<sup>3,5,30</sup>, this is a promising first finding. However, a central question that  
273 remains to be addressed by the field is whether experimental modulations of discounting  
274 behavior can yield clinically relevant behavioral changes<sup>30</sup>. In contrast to training-based  
275 interventions<sup>31</sup>, the present experimental design is likely not suited to induce long lasting  
276 changes in behavior. Nonetheless, our data show that in principle, future thinking can reduce  
277 temporal discounting in pathological gamblers, a clinical group characterized by high levels of  
278 impulsivity <sup>4</sup>. Furthermore, the observed changes in this clinical sample were similar in  
279 magnitude to those observed in healthy young adults. Future studies will likely build upon  
280 recent work that aimed to extend future thinking interventions to everyday decision-making<sup>32-</sup>  
281 <sup>36</sup>.

282 In contrast to the findings in healthy young adolescents and adults as well as gamblers,  
283 older adults showed no effect of future thinking on temporal discounting<sup>15</sup>. This was also shown  
284 in a recent paper from another group<sup>37</sup>. As discussed in detail in our previous paper <sup>15</sup>, in older  
285 adults effects of future thinking might depend on cognitive control abilities. We have shown  
286 that older adults with high levels of cognitive control still benefitted from future thinking,  
287 whereas this was not the case for older adults with relatively lower control abilities<sup>15</sup>. It remains  
288 to be seen whether similar moderation effects play a role in other age groups or populations.

289 This re-analysis of previously published data has a number of limitations. First, the  
290 experimental designs that we applied involved a separation of decision and response phases, as  
291 appropriate for fMRI studies. This precluded us from applying modeling approaches that  
292 leverage information contained in the response time (RT) distributions, as in some of our more  
293 recent work <sup>38,39</sup>. Second, comparison of the effect size estimates between the Bromberg et al.

294 (2017) data set and the other studies is confounded by the fact that the smaller-sooner reference  
295 reward in that study consisted of 10€, whereas it was 20€ in the other data sets. Steeper  
296 discounting and/or a more pronounced effect of the episodic condition in adolescents could thus  
297 be partially attributable to a magnitude effect<sup>40–43</sup>.

298 Taken together, our re-analysis of six previously published data sets that examined the  
299 effects of episodic future thinking on temporal discounting provides comparable effect size  
300 estimates across studies. We hope this resource to be helpful for both future power analyses  
301 and for meta-analyses on contextual modulations of temporal discounting more generally.

302  
303

## 304 **References**

- 305 1. Green, L. & Myerson, J. A discounting framework for choice with delayed and  
306 probabilistic rewards. *Psychol Bull* **130**, 769–92 (2004).
- 307 2. Peters, J. & Büchel, C. The neural mechanisms of inter-temporal decision-making:  
308 understanding variability. *Trends Cogn. Sci.* **15**, 227–239 (2011).
- 309 3. Bickel, W. K., Jarmolowicz, D. P., Mueller, E. T., Koffarnus, M. N. & Gatchalian, K.  
310 M. Excessive discounting of delayed reinforcers as a trans-disease process contributing to  
311 addiction and other disease-related vulnerabilities: Emerging evidence. *Pharmacol Ther* **134**,  
312 287–97 (2012).
- 313 4. Wiehler, A. & Peters, J. Reward-based decision making in pathological gambling: the  
314 roles of risk and delay. *Neurosci. Res.* **90**, 3–14 (2015).
- 315 5. Amlung, M. *et al.* Delay Discounting as a Transdiagnostic Process in Psychiatric  
316 Disorders: A Meta-analysis. *JAMA Psychiatry* (2019) doi:10.1001/jamapsychiatry.2019.2102.
- 317 6. Koffarnus, M. N., Jarmolowicz, D. P., Mueller, E. T. & Bickel, W. K. Changing delay  
318 discounting in the light of the competing neurobehavioral decision systems theory: a review.  
319 *J. Exp. Anal. Behav.* **99**, 32–57 (2013).
- 320 7. Lempert, K. M. & Phelps, E. A. The Malleability of Intertemporal Choice. *Trends*  
321 *Cogn. Sci.* **20**, 64–74 (2016).
- 322 8. Schacter, D. L., Benoit, R. G. & Szpunar, K. K. Episodic Future Thinking:  
323 Mechanisms and Functions. *Curr. Opin. Behav. Sci.* **17**, 41–50 (2017).
- 324 9. Boyer, P. Evolutionary economics of mental time travel? *Trends Cogn Sci* **12**, 219–24  
325 (2008).
- 326 10. Peters, J. & Büchel, C. Episodic Future Thinking Reduces Reward Delay Discounting  
327 through an Enhancement of Prefrontal-Mediotemporal Interactions. *Neuron* **66**, 138–148  
328 (2010).
- 329 11. Rung, J. M. & Madden, G. J. Experimental reductions of delay discounting and  
330 impulsive choice: A systematic review and meta-analysis. *J. Exp. Psychol. Gen.* **147**, 1349–  
331 1381 (2018).
- 332 12. Wiehler, A., Petzschner, F. H., Stephan, K. E. & Peters, J. Episodic Tags Enhance  
333 Striatal Valuation Signals during Temporal Discounting in pathological Gamblers. *eNeuro* **4**,  
334 (2017).
- 335 13. Bromberg, U., Lobatcheva, M. & Peters, J. Episodic future thinking reduces temporal  
336 discounting in healthy adolescents. *PloS One* **12**, e0188079 (2017).
- 337 14. Sasse, L. K., Peters, J., Büchel, C. & Brassens, S. Effects of prospective thinking on  
338 intertemporal choice: The role of familiarity. *Hum. Brain Mapp.* **36**, 4210–4221 (2015).
- 339 15. Sasse, L. K., Peters, J. & Brassens, S. Cognitive Control Modulates Effects of Episodic  
340 Simulation on Delay Discounting in Aging. *Front. Aging Neurosci.* **9**, 58 (2017).



- 341 16. Johnson, M. W. & Bickel, W. K. An algorithm for identifying nonsystematic delay-  
342 discounting data. *Exp Clin Psychopharmacol* **16**, 264–74 (2008).
- 343 17. Peters, J., Miedl, S. F. & Büchel, C. Formal Comparison of Dual-Parameter Temporal  
344 Discounting Models in Controls and Pathological Gamblers. *PLoS ONE* **7**, e47225 (2012).
- 345 18. Sutton, R. S. & Barto, A. G. *Reinforcement Learning: An Introduction*. (MIT Press,  
346 1998).
- 347 19. Plummer, M. JAGS: A program for analysis of Bayesian graphical models using  
348 Gibbs sampling. in *Proceedings of the 3rd international workshop on distributed statistical*  
349 *computing* vol. 124 125 (Technische Universität Wien, 2003).
- 350 20. Marsman, M. & Wagenmakers, E.-J. Three Insights from a Bayesian Interpretation of  
351 the One-Sided P Value. *Educ. Psychol. Meas.* **77**, 529–539 (2017).
- 352 21. Pedersen, M. L., Frank, M. J. & Biele, G. The drift diffusion model as the choice rule  
353 in reinforcement learning. *Psychon. Bull. Rev.* **24**, 1234–1251 (2017).
- 354 22. Enkavi, A. Z. *et al.* Large-scale analysis of test-retest reliabilities of self-regulation  
355 measures. *Proc. Natl. Acad. Sci. U. S. A.* **116**, 5472–5477 (2019).
- 356 23. Kirby, K. N. One-year temporal stability of delay-discount rates. *Psychon Bull Rev* **16**,  
357 457–62 (2009).
- 358 24. Ohmura, Y., Takahashi, T., Kitamura, N. & Wehr, P. Three-month stability of delay  
359 and probability discounting measures. *Exp Clin Psychopharmacol* **14**, 318–28 (2006).
- 360 25. Peters, J. & Büchel, C. Overlapping and Distinct Neural Systems Code for Subjective  
361 Value during Intertemporal and Risky Decision Making. *J. Neurosci.* **29**, 15727–15734  
362 (2009).
- 363 26. Farrell, S. & Lewandowsky, S. *Computational modeling of cognition and behavior*.  
364 (Cambridge University Press, 2018).
- 365 27. Hinson, J. M., Jameson, T. L. & Whitney, P. Impulsive decision making and working  
366 memory. *J Exp Psychol Learn Mem Cogn* **29**, 298–306 (2003).
- 367 28. Hinson, J. M. & Whitney, P. Working memory load and decision making: A reply to  
368 Franco-Watkins, Pashler, and Rickard (2006). *J. Exp. Psychol. Learn. Mem. Cogn.* **32**, 448–  
369 450 (2006).
- 370 29. Franco-Watkins, A. M., Pashler, H. & Rickard, T. C. Does working memory load lead  
371 to greater impulsivity? Commentary on Hinson, Jameson, and Whitney (2003). *J. Exp.*  
372 *Psychol. Learn. Mem. Cogn.* **32**, 443–447; discussion 448–450 (2006).
- 373 30. Lempert, K. M., Steinglass, J. E., Pinto, A., Kable, J. W. & Simpson, H. B. Can delay  
374 discounting deliver on the promise of RDoC? *Psychol. Med.* **49**, 190–199 (2019).
- 375 31. Bickel, W. K., Yi, R., Landes, R. D., Hill, P. F. & Baxter, C. Remember the Future:  
376 Working Memory Training Decreases Delay Discounting Among Stimulant Addicts. *Biol.*  
377 *Psychiatry* **69**, 260–265 (2011).
- 378 32. Daniel, T. O., Said, M., Stanton, C. M. & Epstein, L. H. Episodic future thinking  
379 reduces delay discounting and energy intake in children. *Eat. Behav.* **18**, 20–24 (2015).
- 380 33. Daniel, T. O., Stanton, C. M. & Epstein, L. H. The future is now: reducing impulsivity  
381 and energy intake using episodic future thinking. *Psychol. Sci.* **24**, 2339–2342 (2013).
- 382 34. O’Neill, J., Daniel, T. O. & Epstein, L. H. Episodic future thinking reduces eating in a  
383 food court. *Eat. Behav.* **20**, 9–13 (2016).
- 384 35. Stein, J. S. *et al.* Unstuck in time: episodic future thinking reduces delay discounting  
385 and cigarette smoking. *Psychopharmacology (Berl.)* **233**, 3771–3778 (2016).
- 386 36. Daniel, T. O., Stanton, C. M. & Epstein, L. H. The future is now: Comparing the  
387 effect of episodic future thinking on impulsivity in lean and obese individuals. *Appetite* **71**,  
388 120–125 (2013).
- 389 37. Mok, J. N. Y. *et al.* Is it time? Episodic imagining and the discounting of delayed and  
390 probabilistic rewards in young and older adults. *Cognition* **199**, 104222 (2020).
- 391 38. Peters, J. & D’Esposito, M. The drift diffusion model as the choice rule in inter-

- 392 temporal and risky choice: a case study in medial orbitofrontal cortex lesion patients and  
393 controls. *bioRxiv* 642587 (2019) doi:10.1101/642587.
- 394 39. Wagner, B., Cloos, M., Sommer, T. & Peters, J. Dopaminergic modulation of human  
395 inter-temporal choice: a diffusion model analysis using the D2-receptor-antagonist  
396 haloperidol. *bioRxiv* 2020.02.13.942383 (2020) doi:10.1101/2020.02.13.942383.
- 397 40. Ballard, I. C. *et al.* More Is Meaningful: The Magnitude Effect in Intertemporal  
398 Choice Depends on Self-Control. *Psychol. Sci.* **28**, 1443–1454 (2017).
- 399 41. Green, L., Myerson, J., Oliveira, L. & Chang, S. E. Delay discounting of monetary  
400 rewards over a wide range of amounts. *J Exp Anal Behav* (2013).
- 401 42. Green, L., Myerson, J. & McFadden, E. Rate of temporal discounting decreases with  
402 amount of reward. *Mem. Cognit.* **25**, 715–723 (1997).
- 403 43. Mellis, A. M., Woodford, A. E., Stein, J. S. & Bickel, W. K. A second type of  
404 magnitude effect: Reinforcer magnitude differentiates delay discounting between substance  
405 users and controls. *J. Exp. Anal. Behav.* **107**, 151–160 (2017).
- 406
